# Supplementary material for: Prospective study of dilated cardiomyopathy in dogs eating nontraditional or traditional diets and in dogs with subclinical cardiac abnormalities
Source: PubMed Central journal article supplement — J Vet Intern Med. 2022 Mar 17;36(2):451–63. doi: 10.1111/jvim.16397 (PMC8965249; doi:10.1111/jvim.16397), 2022-03-17
Supplement: JVIM-36-451-s001.pdf [file JVIM-36-451-s001.pdf]

1 **Prospective study of dilated cardiomyopathy in dogs eating non-traditional or traditional**  
2 **diets and in dogs with subclinical cardiac abnormalities**

3 Supplemental Information

4 **Table S1.** Supplemental information on diet pulse and diet pulse/potato scores.

5 *Diet Pulse and Diet Pulse/Potato Score*

6 The ingredients of the diets being fed varied and some diets contained a single pulse in the top 10  
7 ingredients (e.g., chickpeas), whereas others had multiple pulses in the top 10 ingredients (e.g.,  
8 green peas, pea protein, and lentils). Others had multiple pulses but none in the top 10  
9 ingredients. The exact amount of pulses in each diet was not available from manufacturers and  
10 there is no diet analysis that is specific for pulses or potatoes. Therefore, we attempted to  
11 quantify the “dose” of pulses and potatoes each dog was receiving by using diet pulse and  
12 pulse/potato scores. The ingredients in the main diet being eaten by each dog at the time of  
13 enrollment were recorded in order of appearance in the ingredient list of the diet at the time of  
14 enrollment. If the first ingredient on the ingredient list was a pulse, it was given a score of 25,  
15 the second ingredient got a score of 24, and so on down to the 25<sup>th</sup> ingredient, which got a score  
16 of 1. Ingredients after the 25<sup>th</sup> ingredient on the ingredient list did not get a score. For each  
17 appearance of a pulse or pulse fraction (e.g., peas, pea protein, pea starch, red lentils, green  
18 lentils), the corresponding number for its location on the ingredient list was added together to  
19 calculate the total pulse score. Therefore, if a diet had peas in the second position on the  
20 ingredient list (24), pea protein in the fourth position (22), and lentils in the tenth position (16),  
21 the total diet pulse score would be 62. If a dog was eating a consistent mixture of more than 1  
22 diet, the diet with the highest pulse score was used. The compound used to preserve the fat or oil  
23 in diet was not counted as an ingredient (e.g., chicken fat preserved with mixed tocopherols

24 would be counted as a single ingredient). A separate diet pulse/potato score was calculated by  
25 the same method except that potatoes and sweet potatoes were included in the score in addition  
26 to pulses. Labels or label information were collected from most dogs at the time of diagnosis. If  
27 the label was not collected from an individual dog, an internet archive website (Wayback  
28 Machine, <https://archive.org/web/>) was used to identify the ingredient list from the diet on the  
29 date as close as possible to the time of diagnosis. The ingredients of some diets changed  
30 markedly between the beginning and end of the study so, in some cases, the same diet could have  
31 a different score for an individual dog based on the dog's time of enrollment.

32 **Table S2.** Supplemental information on baseline blood testing in all dogs and DNA analysis in Doberman Pinschers and Boxers.

| <b>Variable</b>                                                                                                                         | <b>Sample</b>                  | <b>Laboratory</b>                                                                | <b>Results/Reference Range</b>                                                                                                                                                                                                                                                       |
|-----------------------------------------------------------------------------------------------------------------------------------------|--------------------------------|----------------------------------------------------------------------------------|--------------------------------------------------------------------------------------------------------------------------------------------------------------------------------------------------------------------------------------------------------------------------------------|
| Complete blood count                                                                                                                    | EDTA whole blood               | In-house Clinical Pathology laboratories                                         | ---                                                                                                                                                                                                                                                                                  |
| Biochemistry profile                                                                                                                    | Serum                          | In-house Clinical Pathology laboratories                                         | ---                                                                                                                                                                                                                                                                                  |
| N-terminal B-type natriuretic peptide                                                                                                   | EDTA plasma                    | IDEXX Laboratories, North Grafton, MA                                            | <ul style="list-style-type: none"> <li>• Reference range: 0-900 pmol/L (0-735 pmol/L for Doberman Pinschers)</li> </ul>                                                                                                                                                              |
| High-sensitivity cardiac troponin I                                                                                                     | Serum                          | Texas A&M University Veterinary Gastrointestinal Laboratory, College Station, TX | <ul style="list-style-type: none"> <li>• Reference range: <math>\leq 0.06</math> ng/mL (older dogs <math>&lt; 0.12</math> ng/mL)</li> </ul>                                                                                                                                          |
| Plasma taurine                                                                                                                          | Heparinized plasma             | University of California Davis Amino Acid Laboratory, Davis, CA                  | <ul style="list-style-type: none"> <li>• Low: <math>\leq 40</math> nmol/mL</li> <li>• No known risk for taurine deficiency: 41-59 nmol/mL (categorized as “borderline” in our study)</li> <li>• Normal: 60-120 nmol/mL</li> <li>• High: <math>&gt; 120</math> nmol/mL</li> </ul>     |
| Whole blood taurine                                                                                                                     | Heparinized whole blood        | University of California Davis Amino Acid Laboratory, Davis, CA                  | <ul style="list-style-type: none"> <li>• Low: <math>\leq 150</math> nmol/mL</li> <li>• No known risk for taurine deficiency: 151-199 nmol/mL (categorized as “borderline” in our study)</li> <li>• Normal: 200-350 nmol/mL</li> <li>• High: <math>&gt; 350</math> nmol/mL</li> </ul> |
| DNA testing<br><ul style="list-style-type: none"> <li>• Doberman Pinschers: NCSU DCM1 and NCSU DCM2</li> <li>• Boxers: ARVC1</li> </ul> | Cheek swab or EDTA whole blood | North Carolina State University Veterinary Genetics Laboratory, Raleigh, NC      | <ul style="list-style-type: none"> <li>• Negative</li> <li>• Positive heterozygous</li> <li>• Positive homozygous</li> </ul>                                                                                                                                                         |

34 **Table S3.** Supplemental information on selected nutritional variables also analyzed in the blood  
 35 of small sub-groups of 18 dogs with DCM eating non-traditional diets and 18 healthy dogs  
 36 (median [range]).<sup>a</sup> The number below the results indicates the number of dogs in each group  
 37 tested. Comparisons were made between groups using Mann-Whitney U tests.

| Variable                                  | Dogs with DCM            | Normal dogs              | P-value |
|-------------------------------------------|--------------------------|--------------------------|---------|
| Thiamine (nmol/L) <sup>b</sup>            | 137 (102-228)<br>3       | 193 (183-211)<br>3       | .51     |
| Riboflavin (µg/L) <sup>c</sup>            | 40 (33-46)<br>2          | 40 (27-50)<br>3          | 1.00    |
| Pyridoxal phosphate (nmol/L) <sup>d</sup> | 459.2 (353.4-674.4)<br>3 | 726.2 (621.6-905.6)<br>3 | .13     |
| Choline (µM) <sup>e</sup>                 | 10.6 (8.1-13.1)<br>4     | 8.2 (7.1-14.2)<br>4      | .39     |
| Betaine (µM) <sup>e</sup>                 | 135.3 (92.2-160.4)<br>4  | 140.4 (108.6-273.3)<br>4 | .77     |
| Vitamin E (µg/mL) <sup>f</sup>            | 26.04 (12.94-32.41)<br>4 | 28.21 (24.14-72.93)<br>4 | .56     |
| Selenium (ng/mL) <sup>g</sup>             | 554 (487-585)<br>4       | 483 (437-553)<br>4       | .15     |
| Carnitine (plasma) <sup>h</sup>           |                          |                          |         |
| Total (µmol/L)                            | 25.2 (10.7-40.3)         | 34.8 (23.8-35.4)         | .54     |
| Free (µmol/L)                             | 20.1 (7.1-31.8)          | 28.3 (21.2-30.5)         | .31     |
| Esters (µmol/L)                           | 4.7 (3.6-9.4)            | 4.3 (2.6-7.1)            | .84     |
| Ester/Free Ratio                          | 0.3 (0.2-0.5)<br>8       | 0.1 (0.1-0.3)<br>3       | .07     |
| Carnitine (urine) <sup>h</sup>            |                          |                          |         |
| Total (µmol/L)                            | 27.7 (13.8-42.0)         | 17.7 (12.8-75.0)         | .62     |
| Free (µmol/L)                             | 12.1 (4.0-28.1)          | 12.2 (5.7-62.3)          | 1.00    |
| Esters (µmol/L)                           | 9.6 (8.9-27.0)           | 9.0 (5.5-12.8)           | .46     |
| Ester/Free Ratio                          | 1.4 (0.3-2.5)<br>4       | 0.8 (0.2-1.6)<br>5       | .22     |

38 In addition, an iron panel was analyzed in 4 dogs with DCM and compared to the laboratory's  
 39 reference ranges for dogs. Bolded values were outside the reference range.

| Variable        | Hematocrit (%) | Iron (µg/dL) <sup>i</sup> | Total iron binding capacity (µg/dL) <sup>i</sup> | Ferritin (ng/mL) <sup>j</sup> |
|-----------------|----------------|---------------------------|--------------------------------------------------|-------------------------------|
| Reference range | 39-55          | 73-245                    | 270-530                                          | 89-489                        |
| Dog 1           | 49             | 235                       | 424                                              | <b>586</b>                    |
| Dog 2           | 48             | <b>54</b>                 | 497                                              | <b>629</b>                    |
| Dog 3           | 49             | 111                       | 339                                              | 317                           |
| Dog 4           | 54             | 194                       | 361                                              | <b>602</b>                    |

40 <sup>a</sup>Mean age (DCM, 6.5±2.8 yrs; controls, 7.1±2.7 yrs;  $P=.47$ ), mean body weight (DCM,  
41 33.4±11.8 kg; controls 27.8±12.9 kg,  $P=.19$ ), percentage of female and male dogs (DCM, 10  
42 female and 8 male; controls, 12 female and 6 male;  $P=.37$ ), and breed ( $P=.51$ ) were not  
43 significantly different between groups. The most common breeds represented included Pit Bull  
44 (DCM, n=2, controls, n=4), Doberman Pinscher (DCM, n=3, controls, n=2), Boxer (DCM, n=2,  
45 controls, n=1), and German Shepherd (DCM, n=2, controls, n=1).

46 <sup>b</sup>High-performance liquid chromatography (ARUP Laboratories, Salt Lake City, UT)

47 <sup>c</sup>Liquid chromatography-tandem mass spectrometry (Mayo Clinic Laboratories, Rochester, MN)

48 <sup>d</sup>Enzymatic radioimmunoassay (Nutrition Evaluation Laboratory, Jean Mayer USDA Human  
49 Nutrition Research Center on Aging at Tufts University, Boston, MA)

50 <sup>e</sup>Liquid chromatography-mass spectrometry (University of North Carolina-Chapel Hill Nutrition  
51 Obesity Research Center Metabolomics and Exposome Core, Kannapolis, NC)

52 <sup>f</sup>Ultra-performance liquid chromatography (Michigan State University Veterinary Diagnostic  
53 Laboratory, Lansing, MI)

54 <sup>g</sup>Inductively-coupled plasma mass spectrometry (Michigan State University Veterinary  
55 Diagnostic Laboratory, Lansing, MI)

56 <sup>h</sup>Tandem mass spectrometry (University of California San Diego Biochemical Genetics  
57 Laboratory, San Diego, CA)

58 <sup>i</sup>Spectrophotometry (Kansas State Veterinary Diagnostic Laboratory, Manhattan, KS)

59 <sup>j</sup>Enzyme-linked immunosorbent assay (Kansas State Veterinary Diagnostic Laboratory,  
60 Manhattan, KS)

61 **Table S4.** Supplemental information on medications and taurine supplement administered to  
 62 dogs with DCM over the course of the 9-month prospective study.

| <b>Medication</b>                                 | <b>Total<br/>(n=60)</b> | <b>Non-traditional diet<br/>group (n=51)</b> | <b>Traditional diet<br/>group (n=9)</b> | <b><i>P</i>-value</b> |
|---------------------------------------------------|-------------------------|----------------------------------------------|-----------------------------------------|-----------------------|
| Pimobendan                                        | 58 (97%)                | 49 (96%)                                     | 9 (100%)                                | 1.00                  |
| Furosemide                                        | 47 (78%)                | 40 (78%)                                     | 7 (78%)                                 | 1.00                  |
| Angiotensin<br>converting enzyme<br>inhibitor     | 41 (68%)                | 37 (73%)                                     | 4 (44%)                                 | .13                   |
| Amiodarone                                        | 17 (28%)                | 12 (24%)                                     | 5 (56%)                                 | .10                   |
| Diltiazem                                         | 12 (20%)                | 8 (16%)                                      | 4 (44%)                                 | .07                   |
| Spironolactone                                    | 10 (17%)                | 10 (20%)                                     | 0 (0%)                                  | .33                   |
| Sotalol                                           | 6 (10%)                 | 6 (12%)                                      | 0 (0%)                                  | .58                   |
| Torseamide                                        | 5 (8%)                  | 4 (8%)                                       | 1 (11%)                                 | .57                   |
| Mexiletine                                        | 4 (7%)                  | 3 (6%)                                       | 1 (11%)                                 | .49                   |
| Carvedilol                                        | 4 (7%)                  | 3 (6%)                                       | 1 (11%)                                 | .49                   |
| Clopidogrel                                       | 1 (2%)                  | 1 (2%)                                       | 0 (0%)                                  | 1.00                  |
| Digoxin                                           | 1 (2%)                  | 1 (2%)                                       | 0 (0%)                                  | 1.00                  |
| Taurine<br>supplement* (of 58<br>dogs discharged) | 51 (88%)                | 44 (90%)                                     | 7 (78%)                                 | .59                   |

63  
 64 \*Taurine supplementation was initiated at the time of the dogs' baseline visit for dogs discharged  
 65 from the hospital using 1 of 4 brands (NOW taurine capsules, NOW, Bloomingdale, IL; Solgar  
 66 taurine capsules, Solgar, Leonia, NJ; Twinlab taurine capsules, Twinlab, Boca Raton, FL, or Pet-  
 67 Ag taurine tablets, Pet-Ag, Inc, Hampshire, IL) at a dose based on body weight: Dogs <10 kg

68 were administered 250 mg q 12 hrs, dogs 10-25 kg were administered 500 mg q 12 hrs, and dogs  
69 >25 kg were administered 1000 mg q 12 hrs.
